# Supplementary material for: Plastid-localized xanthorhodopsin increases diatom biomass and ecosystem productivity in iron-limited surface oceans
Source: PubMed Central journal article supplement (PMC10627834; doi:10.1038/s41564-023-01498-5), 2023-10-16

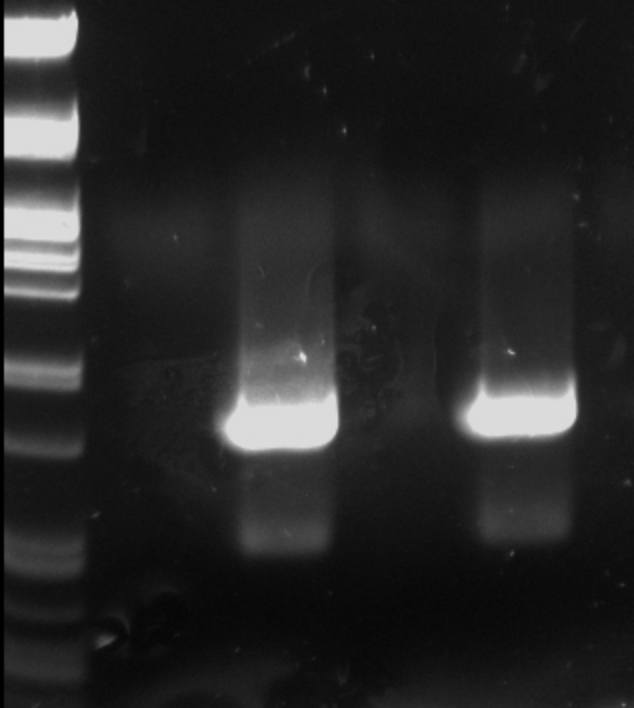

Supplement: 41564_2023_1498_MOESM10_ESM.pdf [file 41564_2023_1498_MOESM10_ESM.pdf]
